# Supplementary material for: Combining Metabolite-Based Pharmacophores with Bayesian Machine Learning Models for Mycobacterium tuberculosis Drug Discovery
Source: PubMed Central journal article supplement (PMC4627656; doi:10.1371/journal.pone.0141076), 2015-10-30
Supplement: pone.0141076.s002.pdf [file pone.0141076.s002.pdf]

PLOS ONE

Supplemental data

**Combining Metabolite-Based Pharmacophores with Bayesian Machine Learning Models  
for *Mycobacterium tuberculosis* Drug Discovery**

Sean Ekins<sup>1,2\*</sup>, Peter B. Madrid<sup>3\*</sup>, Malabika Sarker<sup>3</sup>, Shao-Gang Li<sup>4</sup>, Nisha Mittal<sup>4</sup>, Xin Wang<sup>4</sup>,  
Thomas P. Stratton<sup>4</sup>, Matthew Zimmerman,<sup>5</sup> Carolyn Talcott<sup>3</sup>, Pauline Bourbon<sup>3</sup>, Mike Travers<sup>1</sup>,  
Maneesh Yadav<sup>3</sup> and Joel S. Freundlich<sup>4\*</sup>

<sup>1</sup>Collaborative Drug Discovery Inc., 1633 Bayshore Highway, Suite 342, Burlingame, CA 94010, USA.

<sup>2</sup>Collaborations in Chemistry, 5616 Hilltop Needmore Road, Fuquay-Varina, NC 27526, USA.

<sup>3</sup>SRI International, 333 Ravenswood Avenue, Menlo Park, CA 94025, USA.

<sup>4</sup>Departments of Pharmacology & Physiology and Medicine, Center for Emerging and Reemerging Pathogens, Rutgers University – New Jersey Medical School, 185 South Orange Avenue, Newark, NJ 07103, USA.

<sup>5</sup>Public Health Research Institute, Rutgers University – New Jersey Medical School, Newark, NJ 07103, USA.

\*Authors contributed equally; Addresses for correspondence: Sean Ekins, Collaborative Drug Discovery, 1633 Bayshore Highway, Suite 342, Burlingame, CA 94010, USA. E-

mail:ekinssean@yahoo.com, Phone: 215-687-1320; Peter Madrid, SRI International, 333 Ravenswood Avenue, Menlo Park, CA 94025, USA. E-mail: [peter.madrid@sri.com](mailto:peter.madrid@sri.com); Joel S. Freundlich, Departments of Pharmacology & Physiology and Medicine, Center for Emerging and Reemerging Pathogens, Rutgers University – New Jersey Medical School, 185 South Orange Avenue Newark, NJ 07103, USA. E-mail: [freundjs@rutgers.edu](mailto:freundjs@rutgers.edu), Phone: 973-972-7165.

**Figure S1. Pharmacophores used for database searches.**

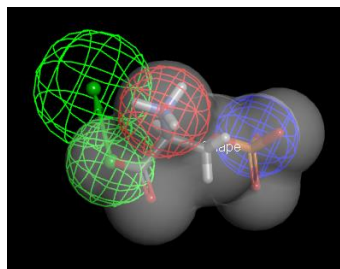

3-phosphoserine

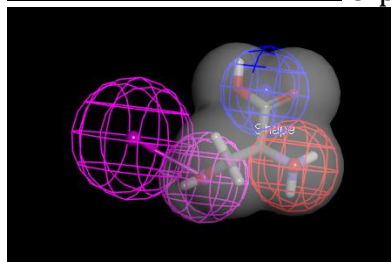

L-serine

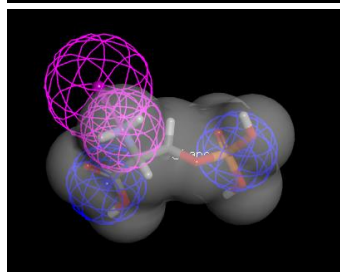

L-(or D)-O-phosphoserine

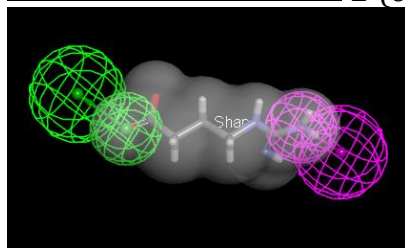

4-guanidinobutyrate

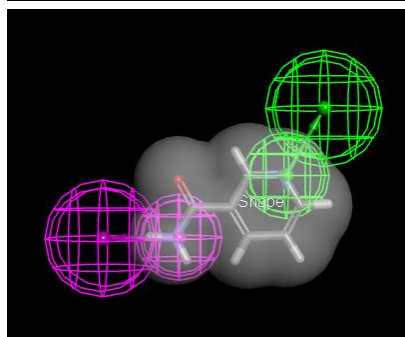

nicotinamide

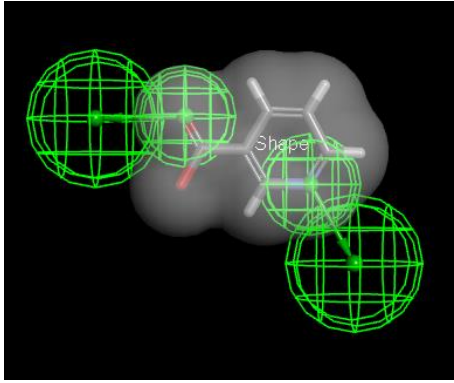

nicotinate

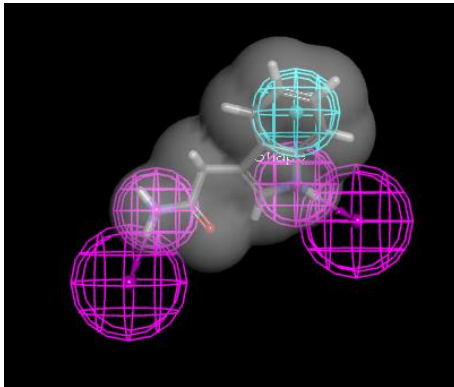

indole-3-acetamide

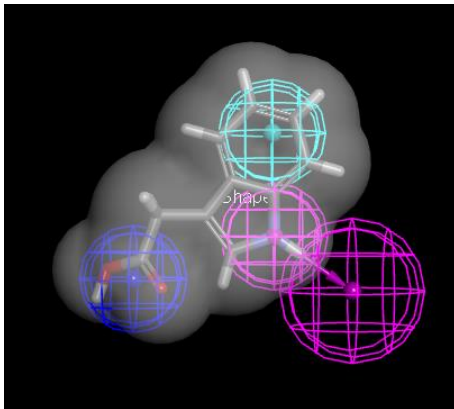

indole-3-acetate

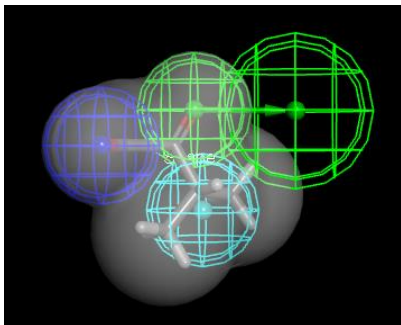

2-oxoisovalerate

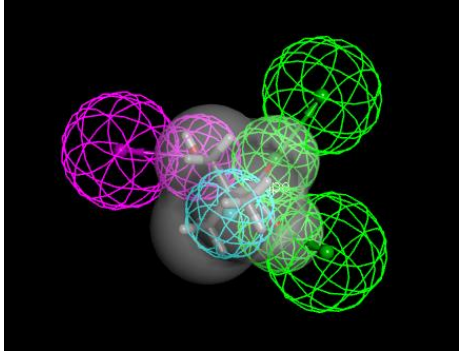

2-dehydropantoate

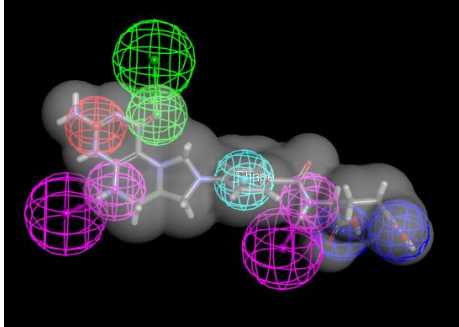

5,10-methylenetetrahydrofolate

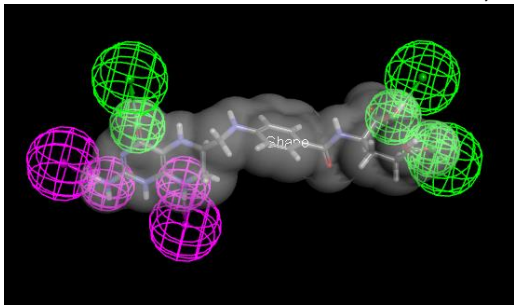

tetrahydrofolate

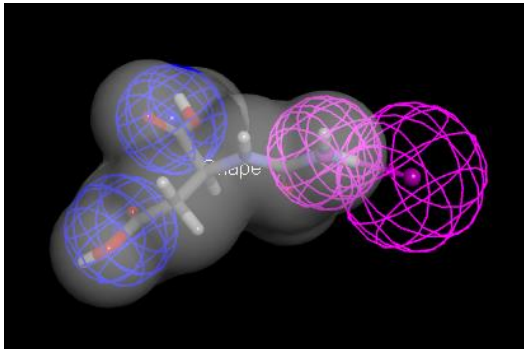

N-carbamoyl-L-aspartate

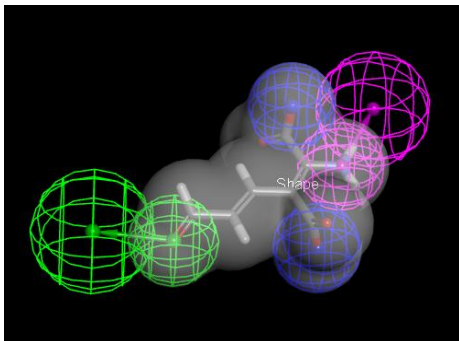

aminocarboxymuconate semialdehyde

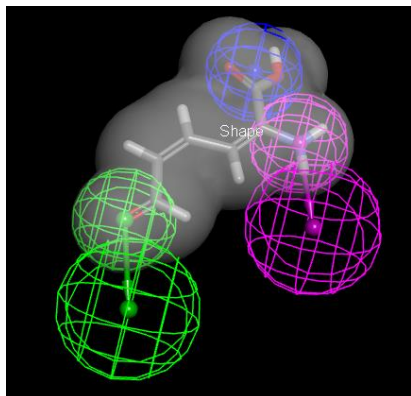

2-aminomuconate semialdehyde

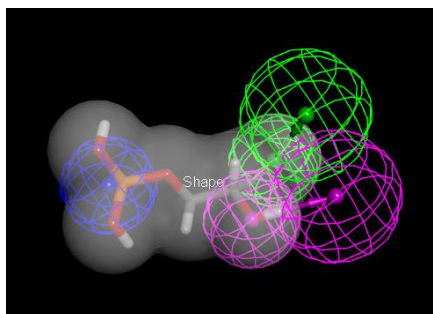

D-glyceraldehyde-3-phosphate

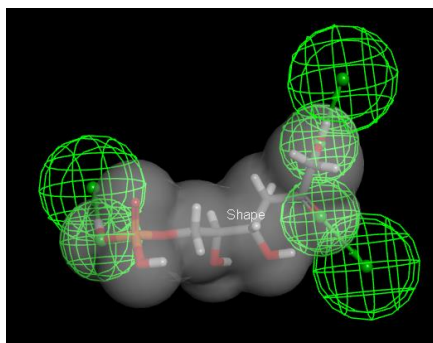

D-fructose-6-phosphate

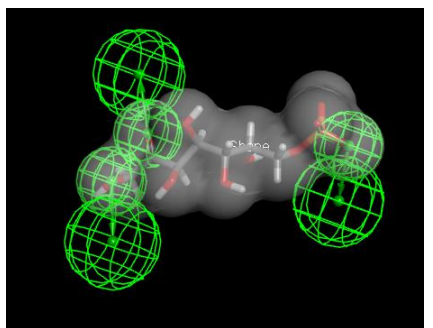

D-sedoheptulose-7-phosphate

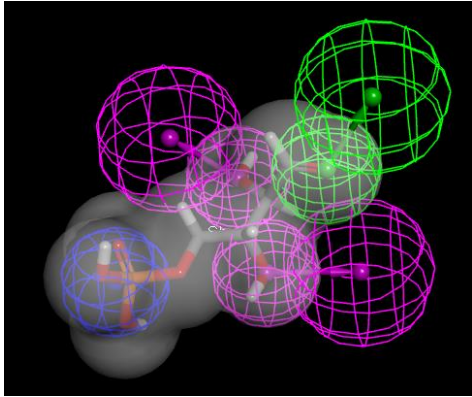

D-erythrose-4-phosphate

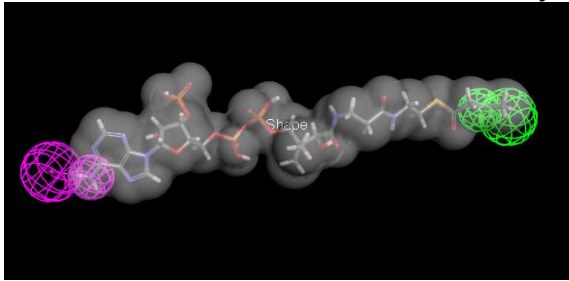

acetoacetyl-CoA

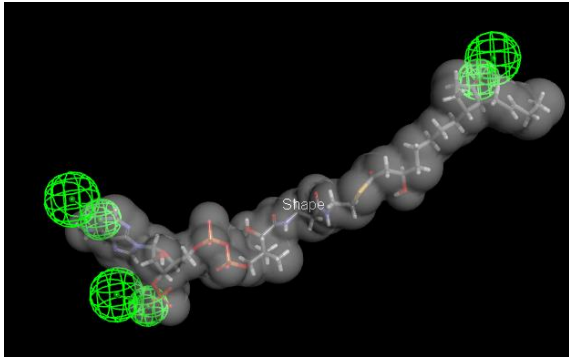

OPC8-3-hydroxyacyl-CoA

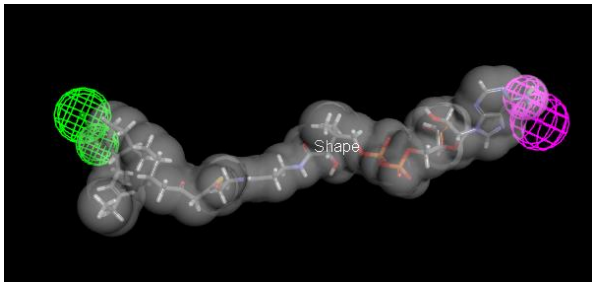

OPC8-3-ketoacyl-CoA

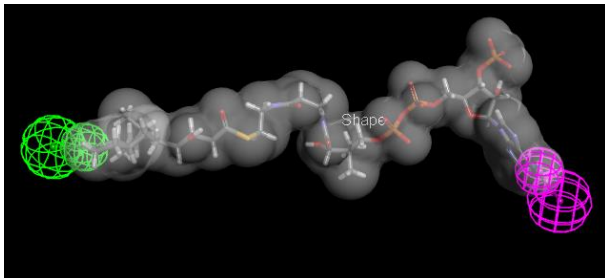

OPC6-3-hydroxylacyl-CoA

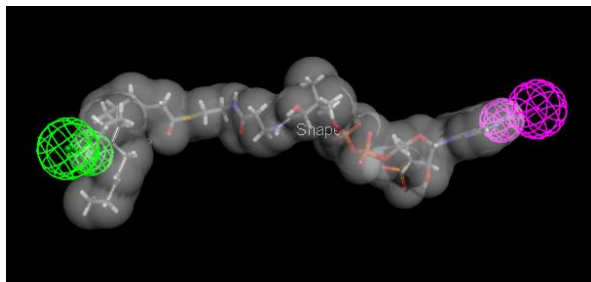

OPC6-3-ketoacyl-CoA

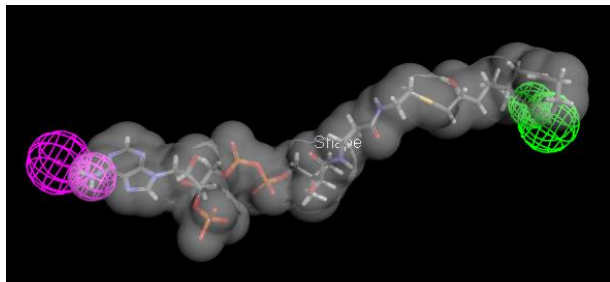

OPC4-3-hydroxylacyl-CoA

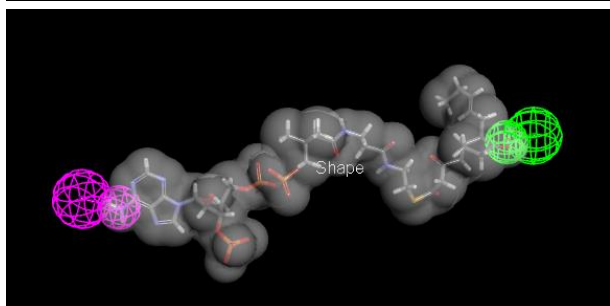

OPC4-3-ketoacyl-CoA

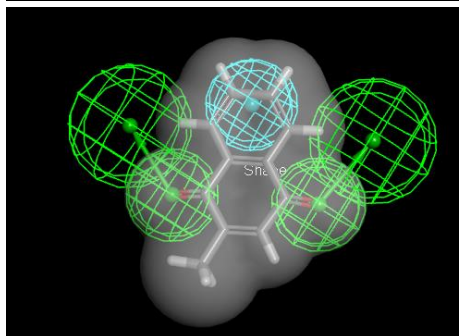

menadione

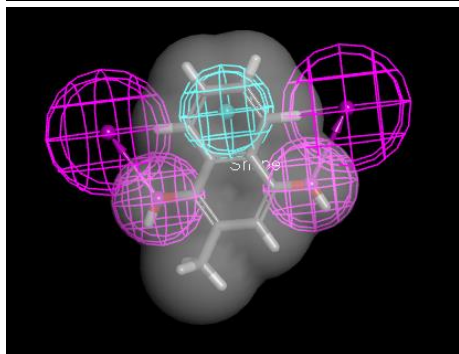

menadiol



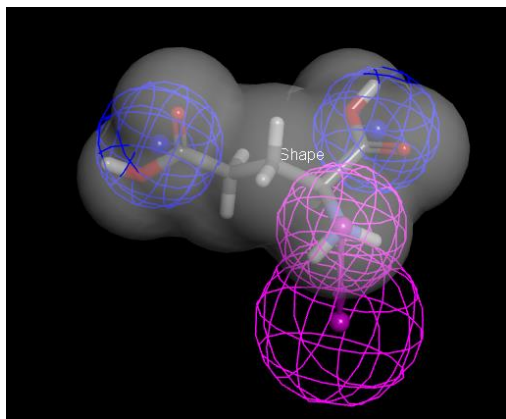

L-glutamate  $\gamma$ -semialdehyde

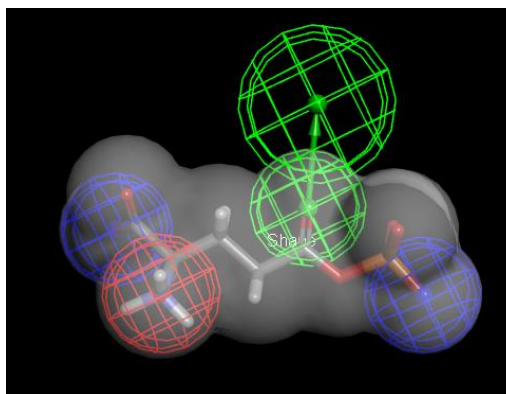

L-glutamate-5-phosphate

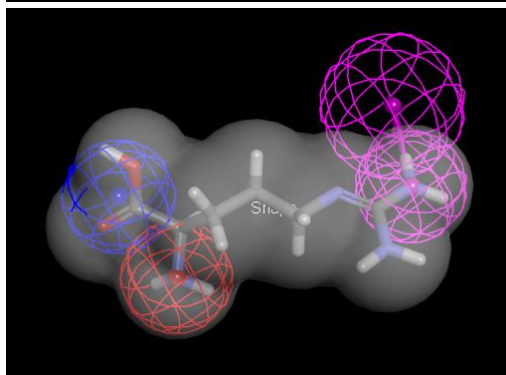

L-arginine

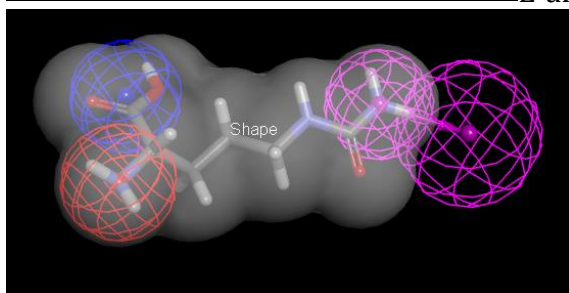

L-citrulline

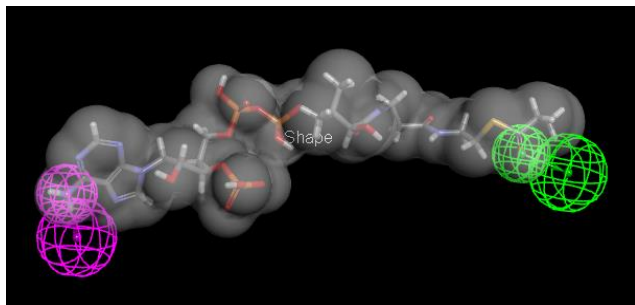

propanoyl-CoA

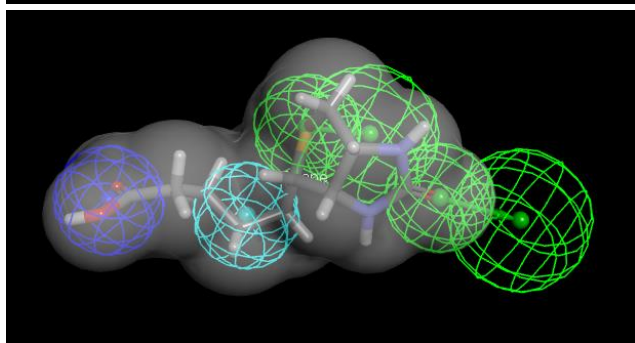

biotin

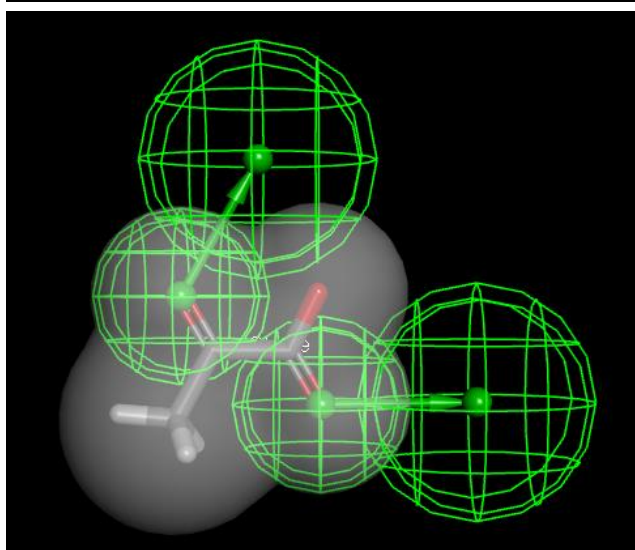

pyruvate

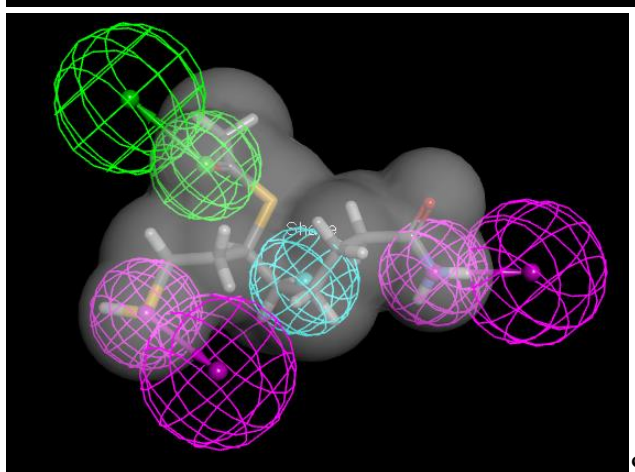

S-acetyldihydrolipoamide

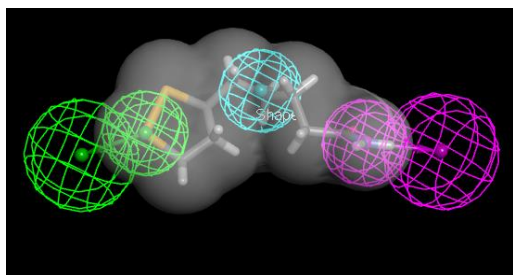

lipoamide

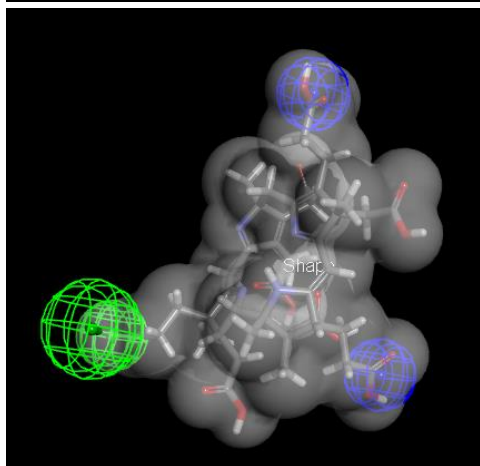

precorrin-6B

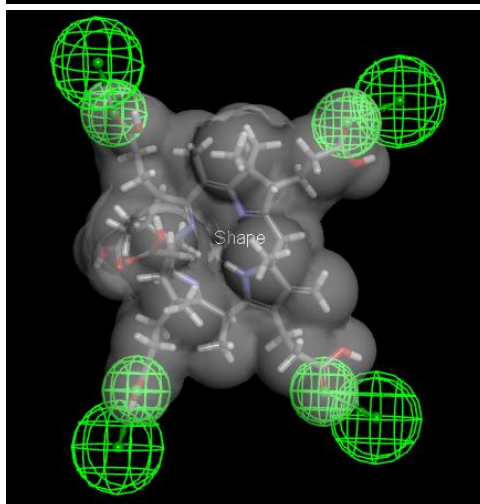

precorrin-8x

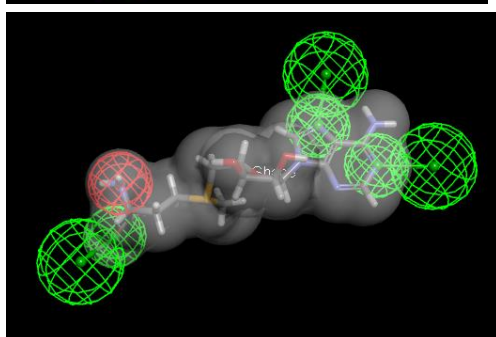

S-adenosyl-L-methionine

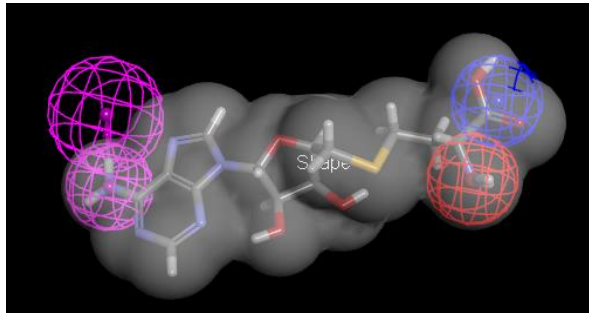

S-adenosyl-L-homocysteine

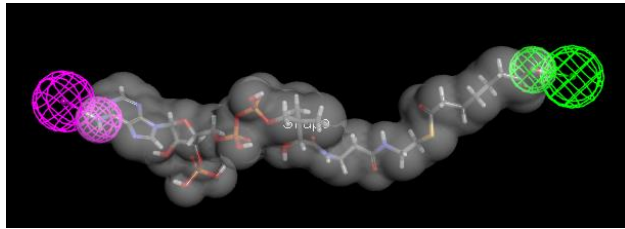

pimeloyl-CoA

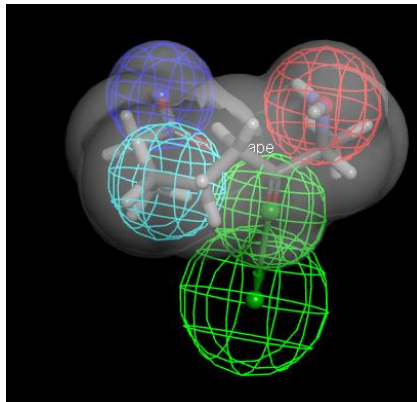

7-keto-8-aminopelargonate

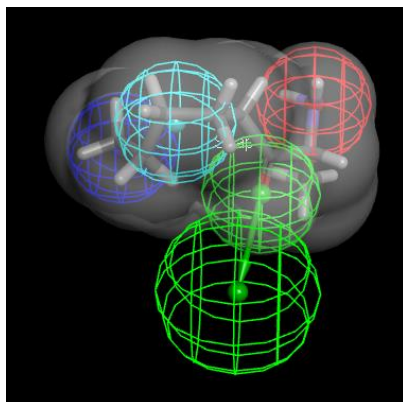

7-keto-8-aminopelargonate

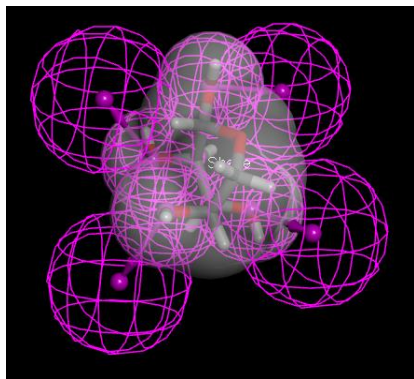

$\alpha$ -D-xylopyranose

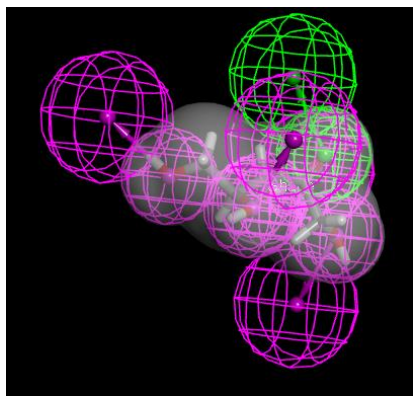

D-xylulose

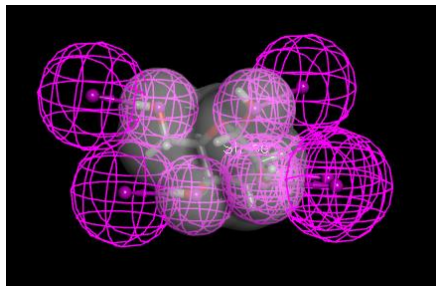

$\beta$ -D-glucose

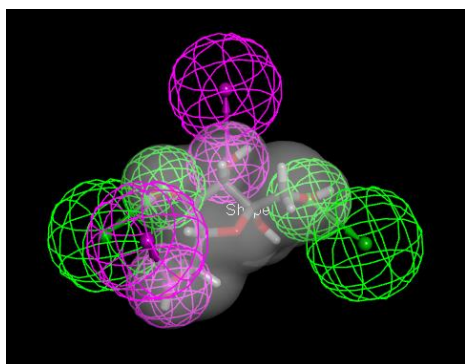

D-fructose

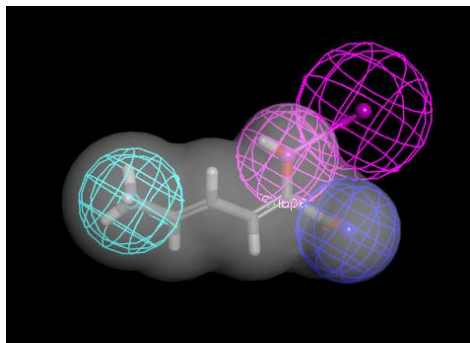

2-hydroxyhexa-2,4,-dienoate

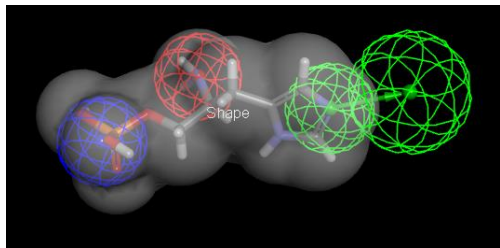

L-histidinol-phosphate

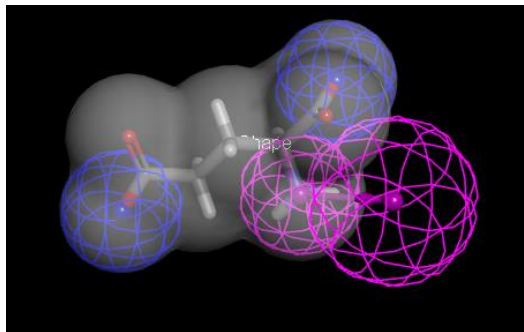

L-glutamate

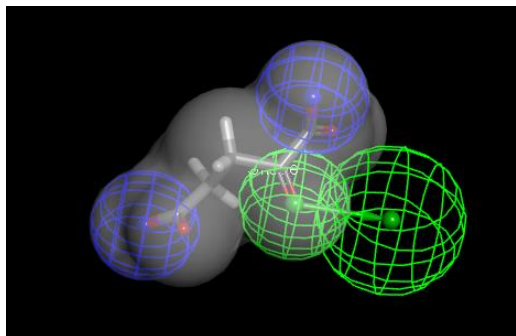

2-oxoglutarate

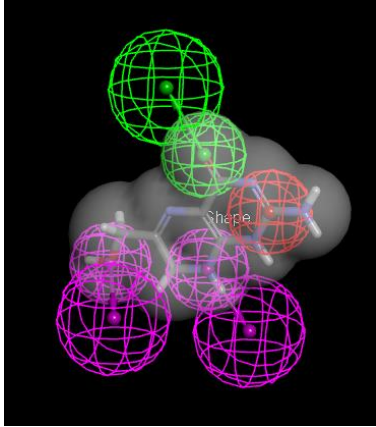

6-hydroxymethyl-7,8-dihydropterin

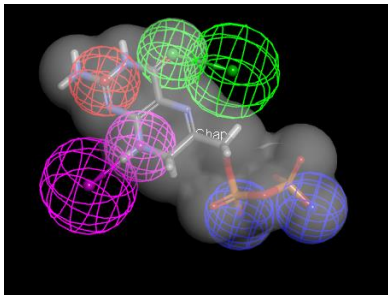

6-hydroxymethyl-dihydropterin diphosphate

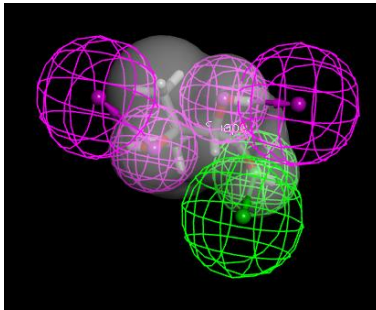

2,3-dihydroxy-3-methylbutanoate

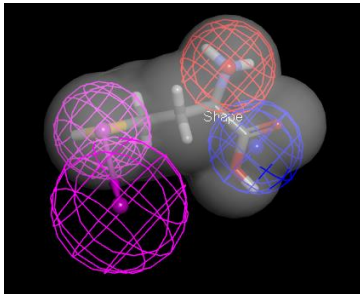

L-homocysteine

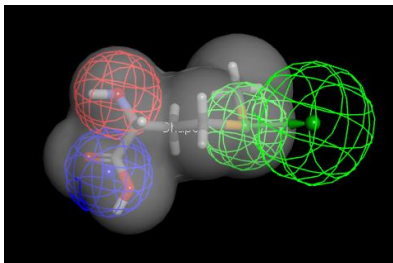

L-methionine

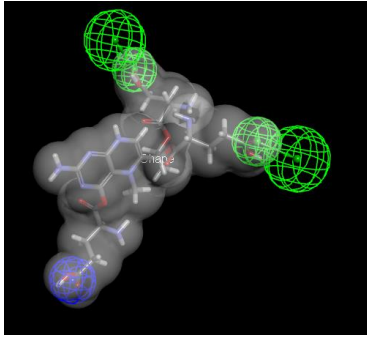

5-methyltetrahydropteroyltri-L-glutamate

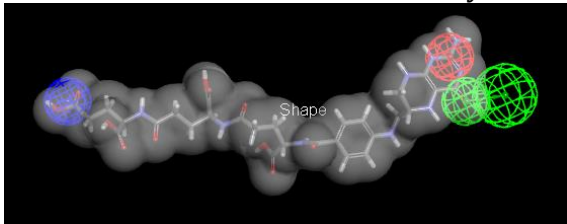

tetrahydropteroyl tri-L-glutamate

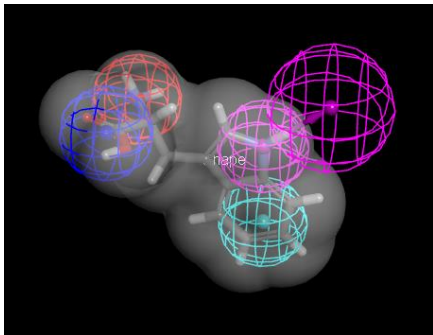

L-tryptophan

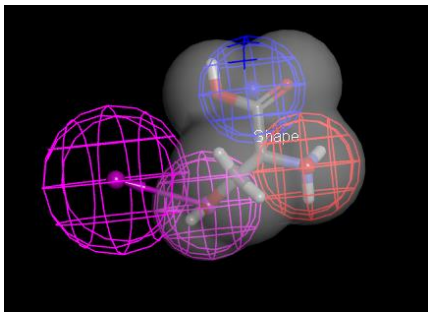

D-serine

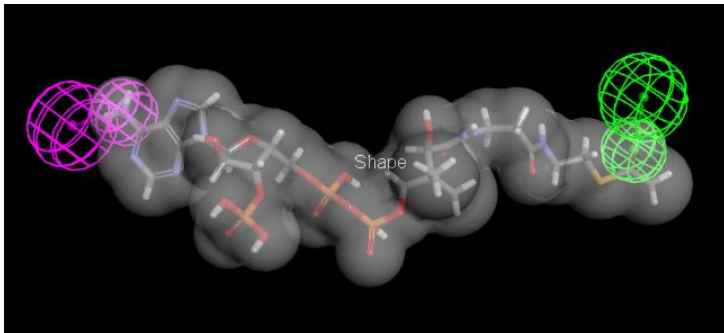

acetyl-CoA



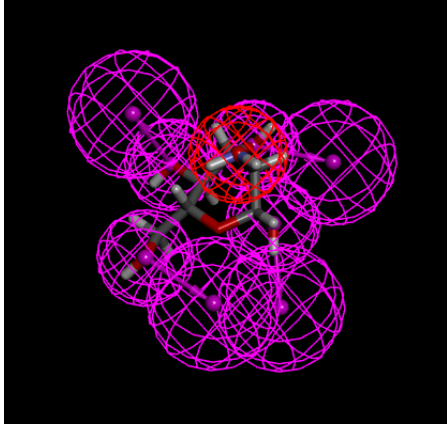

glucosamine

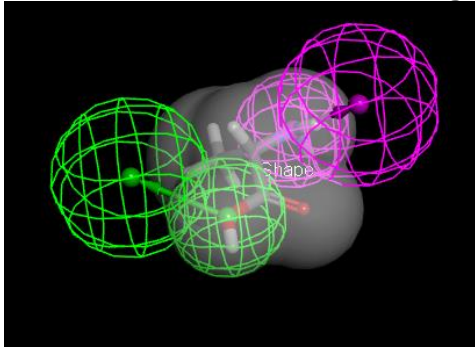

L-alanine

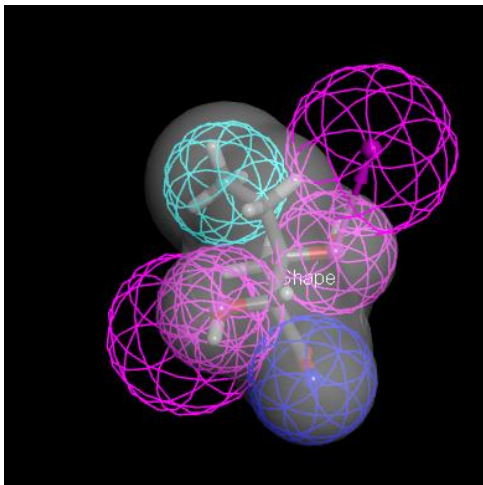

2,3-dihydroxy-3-methylvalerate

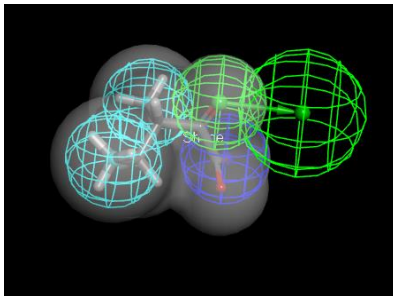

2-keto-3-methyl-valerate

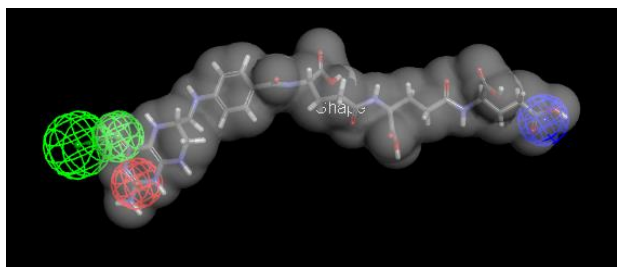

tetrahydropteroyl tri-L-glutamate
