# Supplementary material for: Combining Metabolite-Based Pharmacophores with Bayesian Machine Learning Models for Mycobacterium tuberculosis Drug Discovery
Source: PubMed Central journal article supplement (PMC4627656; doi:10.1371/journal.pone.0141076), 2015-10-30

PLOS ONE

Supplemental data

**Combining Metabolite-Based Pharmacophores with Bayesian Machine Learning Models  
for *Mycobacterium tuberculosis* Drug Discovery**

Sean Ekins<sup>1,2\*</sup>, Peter B. Madrid<sup>3\*</sup>, Malabika Sarker<sup>3</sup>, Shao-Gang Li<sup>4</sup>, Nisha Mittal<sup>4</sup>, Xin Wang<sup>4</sup>,  
Thomas P. Stratton<sup>4</sup>, Matthew Zimmerman,<sup>5</sup> Carolyn Talcott<sup>3</sup>, Pauline Bourbon<sup>3</sup>, Mike Travers<sup>1</sup>,  
Maneesh Yadav<sup>3</sup> and Joel S. Freundlich<sup>4\*</sup>

<sup>1</sup>Collaborative Drug Discovery Inc., 1633 Bayshore Highway, Suite 342, Burlingame, CA 94010, USA.

<sup>2</sup>Collaborations in Chemistry, 5616 Hilltop Needmore Road, Fuquay-Varina, NC 27526, USA.

<sup>3</sup>SRI International, 333 Ravenswood Avenue, Menlo Park, CA 94025, USA.

<sup>4</sup>Departments of Pharmacology & Physiology and Medicine, Center for Emerging and Reemerging Pathogens, Rutgers University – New Jersey Medical School, 185 South Orange Avenue, Newark, NJ 07103, USA.

<sup>5</sup>Public Health Research Institute, Rutgers University – New Jersey Medical School, Newark, NJ 07103, USA.

\*Authors contributed equally; Addresses for correspondence: Sean Ekins, Collaborative Drug Discovery, 1633 Bayshore Highway, Suite 342, Burlingame, CA 94010, USA. E-

mail:ekinssean@yahoo.com, Phone: 215-687-1320; Peter Madrid, SRI International, 333 Ravenswood Avenue, Menlo Park, CA 94025, USA. E-mail: [peter.madrid@sri.com](mailto:peter.madrid@sri.com); Joel S. Freundlich, Departments of Pharmacology & Physiology and Medicine, Center for Emerging and Reemerging Pathogens, Rutgers University – New Jersey Medical School, 185 South Orange Avenue Newark, NJ 07103, USA. E-mail: [freundjs@rutgers.edu](mailto:freundjs@rutgers.edu), Phone: 973-972-7165.

**Figure S2. PCA with the TB mobile dataset showing the 3 hits in yellow – 88.8% of variance explained in 3 PCs.**

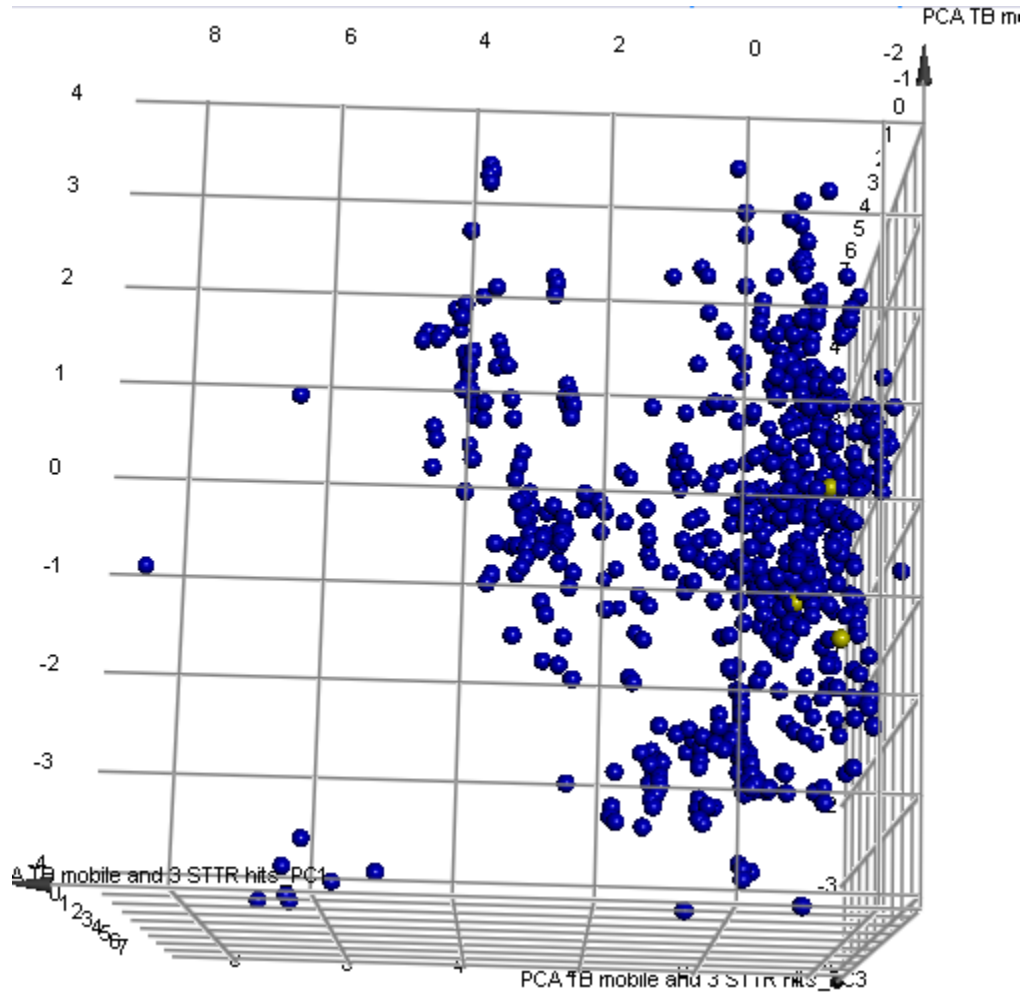

Supplement: pone.0141076.s003.pdf [file pone.0141076.s003.pdf]
