# Supplementary material for: Combining Metabolite-Based Pharmacophores with Bayesian Machine Learning Models for Mycobacterium tuberculosis Drug Discovery
Source: PubMed Central journal article supplement (PMC4627656; doi:10.1371/journal.pone.0141076), 2015-10-30
Supplement: pone.0141076.s004.pdf [file pone.0141076.s004.pdf]

PLOS ONE

Supplemental data

**Combining Metabolite-Based Pharmacophores with Bayesian Machine Learning Models  
for *Mycobacterium tuberculosis* Drug Discovery**

Sean Ekins<sup>1,2\*</sup>, Peter B. Madrid<sup>3\*</sup>, Malabika Sarker<sup>3</sup>, Shao-Gang Li<sup>4</sup>, Nisha Mittal<sup>4</sup>, Xin Wang<sup>4</sup>,  
Thomas P. Stratton<sup>4</sup>, Matthew Zimmerman,<sup>5</sup> Carolyn Talcott<sup>3</sup>, Pauline Bourbon<sup>3</sup>, Mike Travers<sup>1</sup>,  
Maneesh Yadav<sup>3</sup> and Joel S. Freundlich<sup>4\*</sup>

<sup>1</sup>Collaborative Drug Discovery Inc., 1633 Bayshore Highway, Suite 342, Burlingame, CA 94010, USA.

<sup>2</sup>Collaborations in Chemistry, 5616 Hilltop Needmore Road, Fuquay-Varina, NC 27526, USA.

<sup>3</sup>SRI International, 333 Ravenswood Avenue, Menlo Park, CA 94025, USA.

<sup>4</sup>Departments of Pharmacology & Physiology and Medicine, Center for Emerging and Reemerging Pathogens, Rutgers University – New Jersey Medical School, 185 South Orange Avenue, Newark, NJ 07103, USA.

<sup>5</sup>Public Health Research Institute, Rutgers University – New Jersey Medical School, Newark, NJ 07103, USA.

\*Authors contributed equally; Addresses for correspondence: Sean Ekins, Collaborative Drug Discovery, 1633 Bayshore Highway, Suite 342, Burlingame, CA 94010, USA. E-

mail:ekinssean@yahoo.com, Phone: 215-687-1320; Peter Madrid, SRI International, 333 Ravenswood Avenue, Menlo Park, CA 94025, USA. E-mail: [peter.madrid@sri.com](mailto:peter.madrid@sri.com); Joel S. Freundlich, Departments of Pharmacology & Physiology and Medicine, Center for Emerging and Reemerging Pathogens, Rutgers University – New Jersey Medical School, 185 South Orange Avenue Newark, NJ 07103, USA. E-mail: [freundjs@rutgers.edu](mailto:freundjs@rutgers.edu), Phone: 973-972-7165.



B

iPad 4:24 PM 89%

Tuberculosis Mobile CDD

enter drug name filter

E H +Gene +Path

The screenshot displays the Tuberculosis Mobile application interface. At the top, it shows the device name 'iPad', time '4:24 PM', and battery level '89%'. The app title 'Tuberculosis Mobile' and the CDD logo are visible. Below the title bar is a search bar with the placeholder text 'enter drug name filter'. Navigation buttons for 'E' and 'H' are present, along with '+Gene' and '+Path' options. The main area contains a grid of chemical structures for various drugs, each with its name and associated target genes:

- glt** (multiple structures)
- Nicotinamide** (target: *sahH*)
- Isoniazid** (target: *inhA*, *katA*, *dhx*)
- Flv1885c** (target: *Flv1885c*)
- Ethionamide** (target: *inhA*)
- Prothionamide** (target: *sahH*)
- p-Aminosalicylic acid** (target: *IsIP1*, *IsIP2*)

C

iPad 4:26 PM 89%

Tuberculosis Mobile

enter drug name filter

E H +Gene +Path

The screenshot displays the Tuberculosis Mobile application interface. At the top, it shows the device status (iPad, 4:26 PM, 89% battery) and the app title. Below the title is a search bar with the placeholder text "enter drug name filter". To the right of the search bar are buttons for "+Gene" and "+Path", and a small thumbnail of a chemical structure. Below the search bar are two tabs, "E" and "H", and a grid of drug cards. Each card contains a chemical structure and a gene target. The drugs shown include:

- Nicotinamide (target: *sahH*)
- Isoniazid (target: *inhA*, *kasA*, *dirA*)
- Ethionamide (target: *inhA*)
- Prothionamide (target: *sahH*)
- C215 (target: *mmpL3*)
- Other drugs with targets: *glt*, *inhL*, and *inhA*.
