# Supplementary material for: Combining Metabolite-Based Pharmacophores with Bayesian Machine Learning Models for Mycobacterium tuberculosis Drug Discovery
Source: PubMed Central journal article supplement (PMC4627656; doi:10.1371/journal.pone.0141076), 2015-10-30
Supplement: pone.0141076.s005.pdf [file pone.0141076.s005.pdf]

PLOS ONE

Supplemental data

**Combining Metabolite-Based Pharmacophores with Bayesian Machine Learning Models  
for *Mycobacterium tuberculosis* Drug Discovery**

Sean Ekins<sup>1,2\*</sup>, Peter B. Madrid<sup>3\*</sup>, Malabika Sarker<sup>3</sup>, Shao-Gang Li<sup>4</sup>, Nisha Mittal<sup>4</sup>, Xin Wang<sup>4</sup>,  
Thomas P. Stratton<sup>4</sup>, Matthew Zimmerman,<sup>5</sup> Carolyn Talcott<sup>3</sup>, Pauline Bourbon<sup>3</sup>, Mike Travers<sup>1</sup>,  
Maneesh Yadav<sup>3</sup> and Joel S. Freundlich<sup>4\*</sup>

<sup>1</sup>Collaborative Drug Discovery Inc., 1633 Bayshore Highway, Suite 342, Burlingame, CA 94010, USA.

<sup>2</sup>Collaborations in Chemistry, 5616 Hilltop Needmore Road, Fuquay-Varina, NC 27526, USA.

<sup>3</sup>SRI International, 333 Ravenswood Avenue, Menlo Park, CA 94025, USA.

<sup>4</sup>Departments of Pharmacology & Physiology and Medicine, Center for Emerging and Reemerging Pathogens, Rutgers University – New Jersey Medical School, 185 South Orange Avenue, Newark, NJ 07103, USA.

<sup>5</sup>Public Health Research Institute, Rutgers University – New Jersey Medical School, Newark, NJ 07103, USA.

\*Authors contributed equally; Addresses for correspondence: Sean Ekins, Collaborative Drug Discovery, 1633 Bayshore Highway, Suite 342, Burlingame, CA 94010, USA. E-

mail:ekinssean@yahoo.com, Phone: 215-687-1320; Peter Madrid, SRI International, 333 Ravenswood Avenue, Menlo Park, CA 94025, USA. E-mail: [peter.madrid@sri.com](mailto:peter.madrid@sri.com); Joel S. Freundlich, Departments of Pharmacology & Physiology and Medicine, Center for Emerging and Reemerging Pathogens, Rutgers University – New Jersey Medical School, 185 South Orange Avenue Newark, NJ 07103, USA. E-mail: [freundjs@rutgers.edu](mailto:freundjs@rutgers.edu), Phone: 973-972-7165.

## Figure S4. TB Mobile 2.0 predictions.

Bayesian models

A

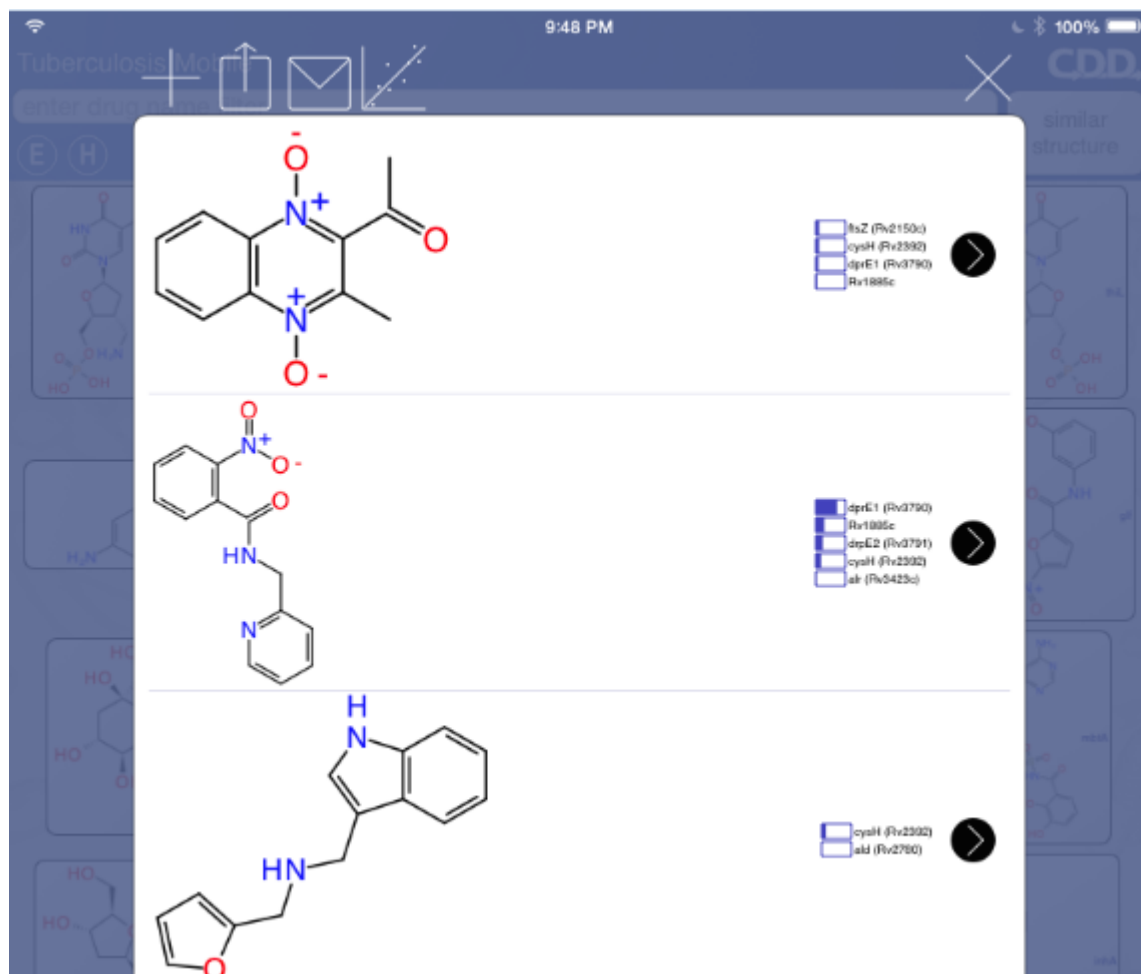

In app similarity predictions

B

Tuberculosis Mobile 9:48 PM 100%

enter drug name filter

+Gene +Path

The screenshot displays a grid of chemical structures for various drugs, each labeled with its name and target. The drugs shown include:

- cysS**: A long-chain bis-benzimidazole derivative.
- dapA**: A pyridine derivative with a methyl ester group.
- cysH**: A complex polycyclic structure with a nitro group.
- inhA**: Multiple structures, including a piperazine derivative and a piperidine derivative.
- glt**: Several structures, including a pyridine derivative with a nitro group and a piperazine derivative.
- salH**: Nicotinamide.
- fabH**: A thiazolidine derivative with a hydroxyl group.
- L2-04**: A pyridine derivative with a thioether group.
- Krieger 4**: A complex structure with a bromine atom and multiple hydroxyl groups.
- ilvG**: A complex structure with a pyridine ring and a thioether group.

Navigation icons at the bottom: Settings (gear), Favorites (star), Home (molecule), and Help (question mark).

C

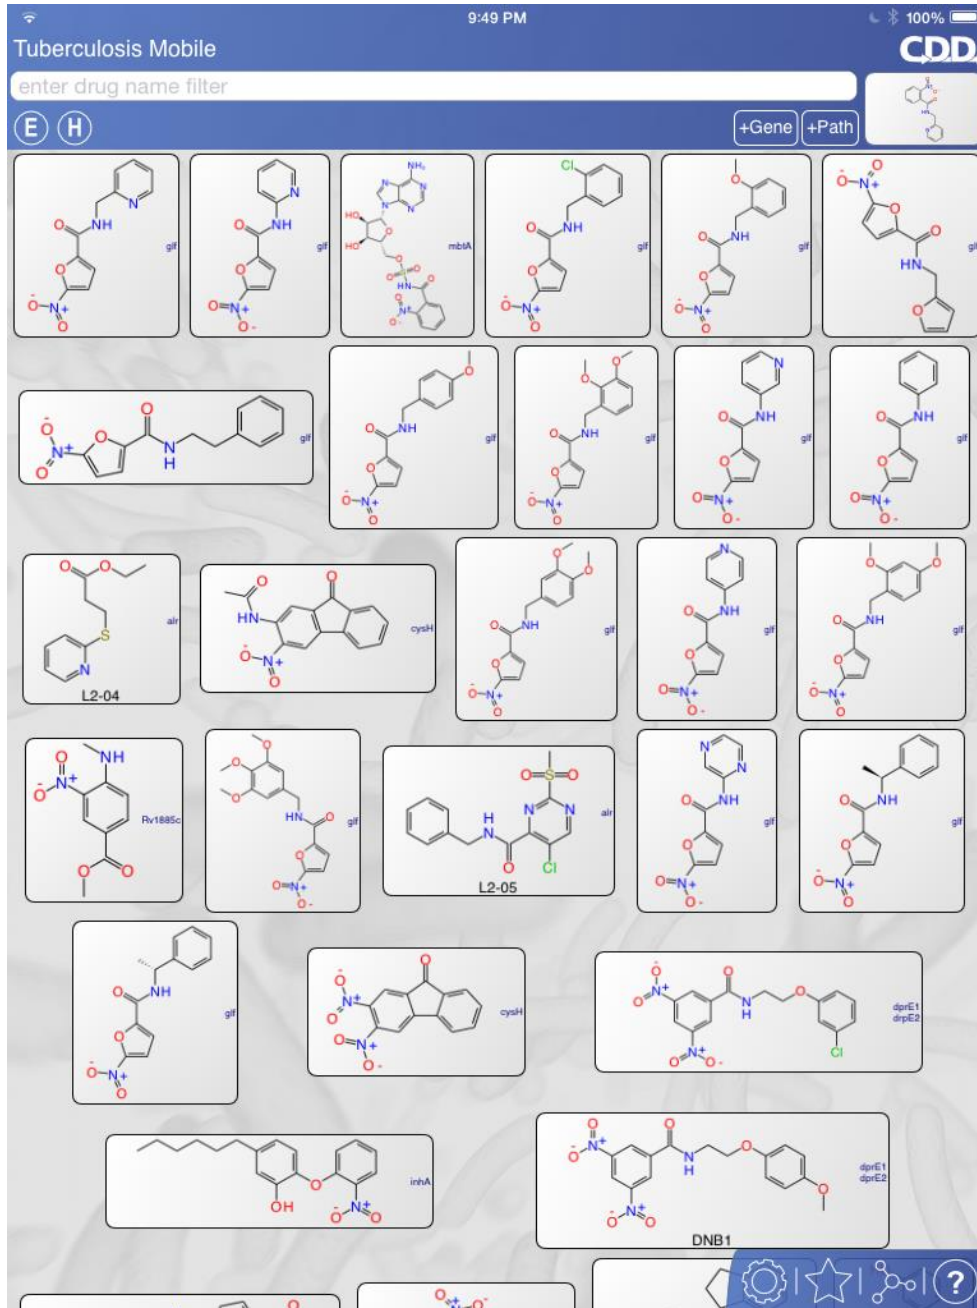

D

Tuberculosis Mobile 9:49 PM 100%

enter drug name filter

+Gene +Path

The screenshot displays a grid of chemical structures for various drugs used in tuberculosis treatment. The drugs are labeled with gene names: inhA, gif, plpB, ndhA, fbpC, and cysH. The interface includes a search bar, navigation buttons, and a bottom menu with icons for settings, favorites, and help.

Chemical structures shown include:

- inhA: A complex molecule with a benzimidazole core and a carboxylic acid group.
- gif: A molecule with a furfuryl ring and a nitro group.
- plpB: A large, complex molecule with multiple amide and ester groups.
- ndhA: A molecule with a quinoline ring and a sulfonamide group.
- fbpC: A molecule with a benzimidazole core and a phosphate group.
- cysH: A molecule with a naphthalene ring and a nitro group.
